# Supplementary material for: Adrenergic activation modulates the signal from the Reissner fiber to cerebrospinal fluid-contacting neurons during development
Source: eLife. 2020 Oct 13;9:e59469. doi: 10.7554/eLife.59469 (PMC7591253; doi:10.7554/eLife.59469)
Supplement: Figure 1—source data 1. [file elife-59469-fig1-data1.xlsx]

## Sheet: Figure1B-C
after normalisation with straight average
		30hpf icm15			48 hpf icm15
urp1		straight	curled		straight	curled
	replicate 1	0.906712	0.865766		1.0147	0.828013
	replicate 2	1.17179	0.815289		0.797962	0.760169
	replicate 3	0.921496	0.698363		1.18733	0.883351
				p-value			p-value
	mean	1	0.79314	0.152095	1	0.823844	0.149471
		30hpf icm15			48 hpf icm15
urp2	replicate 1	straight	curled		straight	curled
	replicate 2	1.27905	0.257934		0.919825	0.265374
	replicate 3	0.803894	0.224545		0.963328	0.239168
		0.917053	0.224027		1.11685	0.325207
	mean			p-value			p-value
		1	0.235502	0.0287248	1	0.276583	0.00298379
qPCR 30hpf icm15 (after lsm12b normalisation)
	replicate1_straight	replicate1_curled	replicate2_straight	replicate2_curled	replicate3_straight	replicate3_curled
urp1	0.0307486	0.0293601	0.0397381	0.0276483	0.03125	0.0236831
straight avg	0.0339122	0.0339122	0.0339122	0.0339122	0.0339122	0.0339122
urp2	0.0231957	0.00467765	0.0145786	0.00407213	0.0166308	0.00406273
straight avg	0.018135	0.018135	0.018135	0.018135	0.018135	0.018135
urp1	0.906712	0.865766	1.17179	0.815289	0.921496	0.698363
urp2	1.27905	0.257934	0.803894	0.224545	0.917053	0.224027
qPCR 48hpf icm15 (after lsm12b normalisation)
	replicate1_straight	replicate1_curled	replicate2_straight	replicate2_curled	replicate3_straight	replicate3_curled
urp1	0.0335704	0.0273939	0.0263997	0.0251494	0.0392817	0.0292247
straight avg	0.0330839	0.0330839	0.0330839	0.0330839	0.0330839	0.0330839
urp2	0.0275845	0.00795825	0.0288891	0.00717238	0.0334929	0.00975258
straight avg	0.0299888	0.0299888	0.0299888	0.0299888	0.0299888	0.0299888
urp1	1.0147	0.828013	0.797962	0.760169	1.18733	0.883351
urp2	0.919825	0.265374	0.963328	0.239168	1.11685	0.325207
