# Supplementary material for: Adrenergic activation modulates the signal from the Reissner fiber to cerebrospinal fluid-contacting neurons during development
Source: eLife. 2020 Oct 13;9:e59469. doi: 10.7554/eLife.59469 (PMC7591253; doi:10.7554/eLife.59469)
Supplement: Figure 1—source data 2. — After filtering for low expression, we kept a list of genes that were differentially expressed in null scospondinicm13/icm13 and hypomorphic scospondinicm15/icm15 mutant embryos at 48 hpf. The table shows the average fold changes in the two alleles and their mean. Genes are ranked based on their p-value that compare the reproducibility of the change inside and between the two alleles using a GLM framework. We adjusted the false discovery rate due to multiple comparisons using the Benjamini-Hochberg procedure (see Materials and methods for details). The raw RNA-seq data have been deposited in the ArrayExpress database at EMBL-EBI (www.ebi.ac.uk/arrayexpress) under accession number E-MTAB-9615. [file elife-59469-fig1-data2.xlsx]

## Sheet: Figure1 RNAseq Decreased
gene	p value (GLM)	Fold change icm13	Fold change icm15	average Fold change	rank	Benjamini–Hochberg criterium
BX001030.1	2.59534e-06	0.234929	0.377616	0.306272	1	0.00166667
urp2	4.83726e-05	0.332152	0.305385	0.318769	2	0.00333333
gabra4	0.000162358	0.592705	0.540748	0.566727	3	0.005
gabra2a	0.000170485	0.581765	0.649505	0.615635	4	0.00666667
CABZ01044731.1	0.000244338	0.584407	0.786844	0.685626	5	0.00833333
pigm	0.000319847	0.668309	0.757893	0.713101	6	0.01
LO017845.1	0.000392832	0.517404	0.668615	0.593009	7	0.0116667
mblac2	0.000456856	0.64565	0.774615	0.710133	8	0.0133333
BEND7	0.00120037	0.665065	0.69965	0.682357	9	0.015
vwa5b2	0.00157646	0.65684	0.68523	0.671035	10	0.0166667
si:ch73-361h17.1	0.00192001	0.539366	0.696209	0.617788	11	0.0183333
CR812464.1	0.0022639	0.398254	0.771504	0.584879	12	0.02
sult1st6	0.00246276	0.612383	0.881141	0.746762	13	0.0216667
si:ch73-55i23.1	0.00322571	0.442112	0.77651	0.609311	14	0.0233333
slc17a7b	0.00337443	0.730799	0.533965	0.632382	15	0.025
psme1	0.00408105	0.822627	0.547721	0.685174	16	0.0266667
hcn4l	0.00426921	0.867271	0.70053	0.7839	17	0.0283333
htr1b	0.00445885	0.705774	0.870544	0.788159	18	0.03
si:dkey-23k10.5	0.00466791	0.65727	0.648755	0.653012	19	0.0316667
eevs	0.00496744	0.696236	0.552993	0.624615	20	0.0333333
drd4a	0.0066229	0.715965	0.614645	0.665305	21	0.035
desmb	0.00747847	0.572722	0.654504	0.613613	22	0.0366667
scospondin	0.00907264	0.435343	0.802241	0.618792	23	0.0383333
cyp8b1	0.00921263	0.634996	0.610424	0.62271	24	0.04
si:ch211-176g13.8	0.0100449	0.859359	0.685447	0.772403	25	0.0416667
CABZ01068273.1	0.0105025	0.503229	0.906945	0.705087	26	0.0433333
si:ch211-276i12.4	0.0115117	1.28966	0.660257	0.97496	27	0.045
antxr1b	0.0116445	0.817862	0.559161	0.688511	28	0.0466667
BX569801.1	0.0121338	0.306719	0.597546	0.452132	29	0.0483333
si:dkey-91i10.3	0.0140227	0.772538	0.758903	0.76572	30	0.05
si:ch211-198c19.3	0.0141416	0.595626	0.922744	0.759185	31	0.0516667
hs3st4	0.0149182	0.704426	0.867774	0.7861	32	0.0533333
dnah9	0.0150308	0.853443	0.444008	0.648726	33	0.055
si:dkey-1d7.3	0.0161926	0.924532	0.858943	0.891738	34	0.0566667
si:dkey-187j14.4	0.0162282	0.701691	0.607842	0.654767	35	0.0583333
glra4b	0.0181833	0.557976	0.933993	0.745985	36	0.06
abcc12	0.0192681	0.767882	0.816993	0.792437	37	0.0616667
arsib	0.0194649	0.9173	0.652593	0.784947	38	0.0633333
cacna2d4a	0.0199178	1.00995	0.726395	0.868171	39	0.065
si:ch211-196c10.13	0.0201921	0.610121	0.635038	0.62258	40	0.0666667
tmem176l.2	0.0203452	1.01299	0.673665	0.843327	41	0.0683333
gldn	0.0214035	0.89604	0.597839	0.74694	42	0.07
zgc:55413	0.0224694	0.553478	0.937042	0.74526	43	0.0716667
abhd8b	0.0237239	1.03061	0.599818	0.815216	44	0.0733333
mslna	0.0238213	0.617882	0.602364	0.610123	45	0.075
hnf4g	0.0243119	0.901779	0.647554	0.774667	46	0.0766667
pgfb	0.0250561	0.714508	0.843183	0.778845	47	0.0783333
anpepa	0.0255557	1.436	0.418486	0.927242	48	0.08
ly6m2	0.0264858	1.19041	0.593007	0.891708	49	0.0816667
guk1b	0.0267671	0.814326	1.42119	1.11776	50	0.0833333
CU695117.1	0.0276784	0.922269	0.823066	0.872667	51	0.085
cdh30	0.0278953	0.673281	0.703028	0.688155	52	0.0866667
cnga3a	0.0281644	0.772834	0.985301	0.879068	53	0.0883333
tagln	0.0284271	1.03044	0.647957	0.8392	54	0.09
si:dkey-31i7.2	0.0287286	1.5099	0.622547	1.06622	55	0.0916667
arr3b	0.0304237	0.856777	0.865387	0.861082	56	0.0933333
zgc:165604	0.0313102	0.675037	0.972826	0.823932	57	0.095
opn1sw1	0.0323995	0.90432	0.528317	0.716318	58	0.0966667
arr3a	0.0324148	0.85621	0.751929	0.80407	59	0.0983333
cnn1b	0.0328136	0.698366	1.02019	0.859279	60	0.1
gnat2	0.0329424	0.814731	0.968011	0.891371	61	0.101667
si:dkey-93n13.1	0.0348352	0.755835	0.898092	0.826963	62	0.103333
snx16	0.0362018	0.169392	1.14778	0.658588	63	0.105
lgals9l1	0.0364202	0.727684	0.855407	0.791546	64	0.106667
opn1lw2	0.0382528	0.987447	1.138	1.06272	65	0.108333
CABZ01114053.1	0.0401456	0.8347	1.64463	1.23967	66	0.11
prph2a	0.0429998	1.15241	1.27477	1.21359	67	0.111667
rgs9a	0.0442416	0.912574	0.966425	0.939499	68	0.113333
si:ch211-48m9.1	0.0446449	0.935665	0.865427	0.900546	69	0.115
PLEKHB1	0.0454305	1.88045	0.649602	1.26502	70	0.116667
pde11al	0.049219	0.732179	1.10501	0.918594	71	0.118333
gngt2b	0.0494538	1.32271	1.40093	1.36182	72	0.12
scpp5	0.0506373	0.794276	0.535272	0.664774	73	0.121667
pnp4b	0.0510501	1.1986	0.546737	0.87267	74	0.123333
omd	0.0511563	0.973959	1.09324	1.0336	75	0.125
si:dkey-95p16.2	0.0522104	0.782193	0.551316	0.666755	76	0.126667
nme2a	0.0535709	1.762	0.686138	1.22407	77	0.128333
BX571757.1	0.0542424	0.819091	0.820773	0.819932	78	0.13
GPR62_(1ofmany)	0.0548397	1.10949	0.589504	0.849497	79	0.131667
plac8.1	0.0553192	0.7202	0.853657	0.786928	80	0.133333
zgc:163073	0.0601342	0.703933	0.696772	0.700352	81	0.135
carm1l	0.0615632	0.710099	0.899681	0.80489	82	0.136667
pdcb	0.0641324	1.04716	0.907239	0.977198	83	0.138333
zgc:136472	0.0665688	0.779166	1.44834	1.11375	84	0.14
pde6ha	0.0771335	1.03924	1.07585	1.05755	85	0.141667
card9	0.0840438	0.749738	0.886179	0.817959	86	0.143333
si:dkey-26i13.8	0.0934195	0.822735	0.96671	0.894722	87	0.145
zgc:66156	0.0957256	1.03156	0.384585	0.708075	88	0.146667
cyp1a	0.0973672	0.69008	1.00483	0.847453	89	0.148333
si:dkey-262g12.7	0.10048	0.92032	0.752236	0.836278	90	0.15
SMIM36	0.111764	1.07378	0.708863	0.891321	91	0.151667
cfhl5	0.116631	0.834035	0.993217	0.913626	92	0.153333
CT573342.1	0.143353	0.730924	0.940631	0.835777	93	0.155
znf423	0.14837	0.639762	1.00835	0.824058	94	0.156667

## Sheet: Figure1 RNAseq Increased
gene	p value (GLM)	Fold change icm13	Fold change icm15	average Fold change	rank	Benjamini–Hochberg criterium
dao.1	1.96918e-05	1.46544	1.47492	1.47018	1	0.00212766
si:ch211-163l21.10	6.6814e-05	1.16457	1.40381	1.28419	2	0.00425532
CU633479.2	0.000281272	3.23248	1.75453	2.49351	3	0.00638298
mrm1	0.000607275	1.62342	1.5164	1.56991	4	0.00851064
zgc:112185	0.000857622	1.29293	1.69944	1.49619	5	0.0106383
apoa4a	0.00167623	1.47767	1.4925	1.48509	6	0.012766
zgc:114046	0.00179021	1.63716	1.43178	1.53447	7	0.0148936
ucp3	0.00209246	1.70413	1.49671	1.60042	8	0.0170213
acp5a	0.00301865	1.26481	1.48145	1.37313	9	0.0191489
si:dkey-266m15.7	0.00439672	1.3288	1.59068	1.45974	10	0.0212766
socs3a	0.00534383	1.45382	1.4658	1.45981	11	0.0234043
cbln13	0.00726015	1.50655	1.87074	1.68865	12	0.0255319
nfe2	0.00805165	1.25983	1.45476	1.3573	13	0.0276596
CU855930.2	0.00808139	1.34721	1.5224	1.4348	14	0.0297872
si:ch211-215p11.1	0.00892089	1.15723	1.38552	1.27138	15	0.0319149
cmtm8a	0.00905693	1.32961	2.02331	1.67646	16	0.0340426
BX511161.1	0.00932892	1.25749	1.31816	1.28782	17	0.0361702
si:dkey-259j3.5	0.00967634	1.37639	1.28532	1.33086	18	0.0382979
parvg	0.00992188	1.51252	1.41136	1.46194	19	0.0404255
si:ch211-223a21.4	0.0101155	1.60867	1.23974	1.4242	20	0.0425532
gp9	0.0110764	1.09886	1.3689	1.23388	21	0.0446809
si:ch73-206d17.1	0.0114227	2.13028	1.3587	1.74449	22	0.0468085
nr4a1	0.0116499	1.29422	1.45723	1.37572	23	0.0489362
ankrd9	0.0117445	1.623	1.68767	1.65534	24	0.0510638
hbae5	0.011843	1.34558	1.82941	1.5875	25	0.0531915
tgm1l4	0.0146092	1.3227	1.54195	1.43233	26	0.0553191
zgc:112977	0.0158712	1.13228	1.82176	1.47702	27	0.0574468
znf977	0.0159848	1.278	1.40184	1.33992	28	0.0595745
zgc:174696	0.0173351	1.90593	1.16851	1.53722	29	0.0617021
he1.1	0.0208886	1.72625	1.47999	1.60312	30	0.0638298
cyr61l1	0.0216846	1.35854	1.34005	1.3493	31	0.0659574
zgc:56622	0.0272097	1.16394	1.63347	1.39871	32	0.0680851
si:dkey-63j12.4	0.0290282	1.84603	1.00891	1.42747	33	0.0702128
si:dkey-19a16.7	0.0297413	1.03547	2.02348	1.52947	34	0.0723404
gaa	0.0307346	1.21768	1.51658	1.36713	35	0.0744681
BX649479.1	0.032716	1.6594	1.11376	1.38658	36	0.0765957
ctslb	0.0333644	1.40135	1.41317	1.40726	37	0.0787234
nub1	0.0336034	0.80345	2.28227	1.54286	38	0.0808511
CR847543.1	0.0406153	1.07351	1.59977	1.33664	39	0.0829787
si:ch211-256e16.6	0.0429458	1.52449	1.28644	1.40547	40	0.0851064
si:dkey-269i1.4	0.0430821	1.55335	1.52992	1.54163	41	0.087234
si:dkey-239j18.3	0.0445982	1.85245	1.335	1.59373	42	0.0893617
cart3	0.0461478	1.62431	2.08994	1.85712	43	0.0914894
g0s2	0.0485184	1.54692	1.91447	1.73069	44	0.093617
hbbe3	0.0488386	1.2179	1.81405	1.51597	45	0.0957447
he1.2	0.0500237	1.92746	1.4254	1.67643	46	0.0978723
nkx3-1	0.0508029	1.8334	1.15183	1.49261	47	0.1
TCIM_(1ofmany)	0.0545391	1.9694	1.4585	1.71395	48	0.102128
nppb	0.0596952	1.94808	1.91921	1.93365	49	0.104255
pcdh2aa1	0.0673193	1.47665	1.14587	1.31126	50	0.106383
si:dkey-157l19.2	0.0688175	1.34492	1.25952	1.30222	51	0.108511
foxe3	0.0749479	2.08139	1.2148	1.64809	52	0.110638
fosab	0.0765764	2.29543	1.3198	1.80762	53	0.112766
calhm5.2	0.0797456	1.17029	1.24157	1.20593	54	0.114894
si:ch211-170d8.2	0.0864878	1.46957	1.30036	1.38496	55	0.117021
rn7sk	0.0941382	3.04736	4.21467	3.63102	56	0.119149
zgc:112234	0.103199	1.8225	2.06762	1.94506	57	0.121277
bfsp2	0.104679	1.86597	1.38619	1.62608	58	0.123404
si:dkey-26g8.5	0.105447	1.29686	1.92831	1.61258	59	0.125532
si:dkey-207l24.2	0.114783	1.22308	1.33885	1.28097	60	0.12766
zgc:174855	0.116907	1.76237	1.56603	1.6642	61	0.129787
zgc:174153	0.117734	1.85623	1.68509	1.77066	62	0.131915
si:ch73-335l21.4	0.121314	1.31868	1.37208	1.34538	63	0.134043
nmrk1	0.124169	0.934362	1.71407	1.32422	64	0.13617
egr4	0.137856	1.27859	1.61291	1.44575	65	0.138298
AL935186.9	0.139988	1.67254	3.39524	2.53389	66	0.140426
