# Supplementary material for: Adrenergic activation modulates the signal from the Reissner fiber to cerebrospinal fluid-contacting neurons during development
Source: eLife. 2020 Oct 13;9:e59469. doi: 10.7554/eLife.59469 (PMC7591253; doi:10.7554/eLife.59469)
Supplement: Figure 2—source data 1. [file elife-59469-fig2-data1.xlsx]

## Sheet: Figure2C
Normalized integrated calcium variation over time
ventral CSF-contacting neurons
icm15	+/+	+/-	-/-
median	906.429	890.4	427.262
	165.777	243.433	165.777
	205.279	254.513	181.527
	230.355	263.615	187.737
	257.978	276.329	204.929
	267.176	281.37	204.98
	270.743	284.787	215.761
	272.501	286.642	218.674
	277.102	290.872	220.551
	283.127	291.248	226.213
	289.826	293.446	243.492
	293.543	298.586	247.381
	325.266	298.608	251.557
	329.419	301.675	252.439
	333.214	307.525	257.157
	333.394	309.806	258.634
	335.617	310.275	260.273
	338.601	314.606	263.067
	339.132	320.882	263.631
	347.125	321.666	265.426
	351.896	327.211	269.291
	354.901	334.894	270.926
	360.239	337.242	272.913
	365.38	338.502	273.698
	370.941	340.761	276.375
	372.417	341.078	277.608
	391.518	343.915	278.442
	392.465	344.405	280.449
	396.299	348.03	282.351
	413.579	348.728	282.493
	417.742	350.096	283.147
	421.535	350.22	284.53
	421.595	351.898	285.426
	428.817	353.883	289.464
	433.128	355.1	290.295
	435.156	363.788	293.516
	446.09	364.852	293.933
	460.295	364.996	297.642
	484.812	365.773	298.415
	488.369	366.671	300.901
	488.787	378.769	301.002
	494.287	379.103	302.551
	500.97	382.263	303.153
	523.294	384.344	305.282
	542.819	389.114	305.327
	618.515	390.261	306.416
	631.093	390.92	306.534
	644.788	393.345	307.524
	649.533	396.46	308.187
	652.668	396.787	311.71
	667.686	397.961	311.984
	668.431	399.525	312.89
	669.378	408.589	315.66
	670.141	414.185	318.057
	678.349	414.535	318.099
	694.095	417.466	319.518
	696.099	420.071	321.323
	701.823	420.17	321.503
	712.414	421.107	322.635
	734.944	429.716	324.439
	737.494	430.473	324.459
	757.608	430.852	325.718
	782.105	431.517	326.695
	789.065	436.706	327.296
	794.187	436.955	330.201
	799.659	439.988	330.461
	809.09	440.605	330.922
	814.601	445.88	332.096
	814.825	445.958	332.574
	817.634	449.687	333.27
	830.504	450.222	334.285
	884.88	451.553	334.314
	891.289	453.306	334.832
	892.375	454.272	335.46
	920.483	457.641	337.123
	929.713	462.346	341.046
	933.653	463.649	342.046
	949.656	464.063	343.329
	984.939	471.064	343.484
	1001.64	471.389	344.794
	1010.98	475.699	345.731
	1020.68	475.874	346.793
	1029.49	484.889	346.85
	1068.65	485.192	348.091
	1076.18	488.586	348.878
	1078.15	490.353	349.012
	1102	495.084	349.763
	1139.18	498.108	350.465
	1142.1	500.039	350.759
	1166.09	502.752	353.746
	1176.64	504.135	354.793
	1213.24	509.77	355.964
	1218.52	512.831	356.059
	1226.13	513.574	356.582
	1230.37	517.311	359.956
	1246.21	525.724	360.432
	1259.57	527.199	360.638
	1350.65	529.126	363.847
	1373.15	533.412	364.198
	1402.76	547.651	368.342
	1435.45	548.032	369.304
	1473.81	550.057	371.744
	1502.78	552.432	371.969
	1600.78	552.758	374.088
	1623.92	557.071	375.311
	1700.6	561.83	380.699
	1719.22	571.039	383.354
	1728.98	584.248	384.04
	1767.04	589.612	384.319
	1774.68	590.388	386.243
	1802.3	591.87	386.47
	1891.85	593.665	386.824
	1907.39	594.977	386.831
	1932.96	607.256	387.002
	1940.46	638.275	387.483
	1968.53	642.848	387.967
	2012.27	657.68	388.161
	2022.35	659.605	388.993
	2090.34	664.426	389.386
	2187.84	687.884	389.517
	2360.18	701.238	390.074
	2381.44	704.757	390.282
	2403.64	712.923	391.445
	2406.17	723.798	391.797
	2466.49	734.493	394.631
	2467.08	739.845	395.42
	2526.34	745.2	395.986
	2681.14	759.149	396.261
	2707.58	765.596	396.618
	2732.12	779.325	398.306
	2799.94	782.219	398.813
	2810.79	787.612	399.358
	3007.78	792.356	403.985
	3094.13	792.981	405.428
	3098.83	810.511	408.023
	3255.44	826.347	408.721
	3359.17	842.092	408.731
	3785.82	847.116	409.083
	3824.54	852.42	409.464
	3832.5	863.577	409.545
	3961.1	866.628	412.031
	4388.5	883.57	412.741
	4480.06	886.14	413.038
	4622.62	889.21	414.402
	4623.81	890.4	415.346
	4980.9	893.597	415.383
	5565.22	905.861	416.587
		929.889	418.238
		978.299	419.271
		981.618	419.917
		982.043	422.142
		989.159	423.73
		992.548	423.909
		1000.92	424.622
		1028.25	427.262
		1047.39	428.412
		1070.83	428.81
		1072.43	429.334
		1077.09	429.55
		1092.35	430.493
		1125.45	430.984
		1133.97	431.104
		1142.11	432.945
		1147.97	434.286
		1155.66	435.751
		1194.35	437.423
		1208.95	438.331
		1262.4	438.61
		1268.08	438.679
		1273.07	440.71
		1291.52	440.785
		1305.27	441.45
		1318.13	441.913
		1376.22	444.174
		1412.32	446.592
		1441.45	447.285
		1447	448.078
		1460.7	448.304
		1463.63	448.632
		1479.2	451.258
		1480.54	454.335
		1513.7	454.824
		1543.22	455.576
		1571.36	455.874
		1578.84	458.877
		1585.9	459.974
		1592.68	461.101
		1594.22	463.768
		1595.49	467.822
		1609.36	468.993
		1627.81	469.539
		1628.17	471.107
		1644.73	473.219
		1667.04	473.35
		1727.17	479.996
		1753.87	486.086
		1757.51	487.684
		1764.56	490.857
		1773.24	492.123
		1863.09	501.468
		1891.99	502.625
		1902.41	504.477
		1959.27	506.081
		2001.96	507.356
		2027.58	509.207
		2052.71	512.496
		2057.93	512.55
		2060.21	516.774
		2084.95	520.151
		2128.89	522.513
		2139.2	525.822
		2163.87	536.174
		2175.59	543.823
		2176.87	544.127
		2186.79	546.641
		2243.12	548.165
		2254.32	550.356
		2276.04	551.886
		2406.68	555.621
		2442.5	556.777
		2520.16	560.899
		2525.82	562.119
		2538.88	567.198
		2589.22	571.848
		2605.2	574.092
		2649.09	575.068
		2733.19	578.602
		2749.4	578.758
		2758.57	580.623
		2782.95	587.414
		2840.73	590.876
		2849.16	592.302
		2865.66	595.835
		2876.04	606.619
		2894.7	623.411
		2913.53	623.49
		2918.22	625.744
		2938.54	629.975
		3038.88	636.196
		3114.57	640.056
		3119.08	657.111
		3120.22	657.688
		3149.87	659.786
		3269.74	670.221
		3303.83	672.097
		3307.61	674.85
		3408.87	677.975
		3416.09	678.336
		3419.78	690.496
		3424.73	696.08
		3435.22	705.052
		3509.56	705.992
		3513.04	708.24
		3545.34	711.065
		3567.47	712.718
		3708.26	718.269
		3717.33	723.635
		3748.84	724.486
		3749.34	727.883
		3757.87	735.729
		3794.63	741.786
		3931.97	742.088
		3963.88	742.107
		3999.05	755.346
		4058.92	770.678
		4087.5	786.719
		4203.97	789.819
		4272.25	793.433
		4287.55	848.739
		4348.01	849.163
		4370.16	870.14
		4485.97	892.169
		4572.81	932.253
		4630.33	968.29
		4786.52	985.991
		4838.5	988.474
		4904.69	1014.13
		4990.98	1028.37
		5258.74	1038.21
		5333.25	1081.66
		5510.24	1099.02
		6038.02	1169.75
		6482.87	1195.26
		6601.92	1260.87
		6631.08	1268.39
		6687.87	1305.27
		7047.1	1341.29
		8167.94	1352.29
			1421.9
			1547.44
			1600.7
			1779.24
			2052.71
			2079.74
			2175.59
			2243.12
			2913.53
			2918.22
			3416.09
			4203.97
			4420.24
			5258.74
			5275.26
			5648.81
			6631.08
			7047.1
			8167.94
			8874.29

## Sheet: Figure2-suppl1B
Normalized integrated calcium variation over time
ventral CSF-contacting neurons
icm13	+/+	+/-	-/-
median	999.934	1267.24	610.121
	449.072	449.097	1018.67
	1007.14	4933.98	844.376
	1328.21	893.855	720.288
	433.996	1875.91	812.297
	515.984	637.356	610.121
	1013.37	2711.71	1006.53
	1149.16	394.89	824.916
	1936.23	407.257	803.527
	3156.58	2375.14	581.172
	2162.75	545.151	836.889
	392.559	664.008	1497.33
	2457.25	407.376	2120.99
	531.338	550.26	1047.41
	861.476	742.099	803.011
	2048.56	1903.48	379.283
	848.233	1598.11	356.411
	471.411	392.251	534.08
	846.237	3412.84	607.207
	999.934	330.37	490.066
	540.58	493.038	508.977
	615.473	470.662	361.149
	622.922	297.434	626.238
	4640.32	373.625	644.527
	2767.12	283.231	540.668
	1487.28	481.658	411.079
	3262.75	426.151	482.683
	2617.77	1428.18	492.279
	4736.48	2398.24	581.376
	895.697	536.571	544.719
	2435.33	141.082	1204.92
	1682.91	296.009	1129.23
	1654.98	574.115	562.887
	3194.04	249.792	435.98
	3054.74	465.652	741.132
	1612.85	612.974	604.576
	2550.62	278.686	1284.23
	2896.48	413.22	748.802
	785.67	155.3	1263.83
	2633.02	1691.21	1183.78
	506.26	159.829	1190.1
	401.49	3163.55	2160.86
	582.385	144.78	837.02
	331.545	1862.45	1012.66
	1262.55	1420.9	1002.48
	2078.77	4640.53	1660.78
	692.628	1297.89	1404.79
	1640.22	1308.15	1425.44
	2384.78	2754.85	1411.28
	722.347	1773.72	1329.58
	4197.41	1238.38	1333.54
	3630.73	329.931	1789.38
	1319.16	859.86	884.142
	2431.33	3092.79	1011.87
	3689.19	310.044	423.077
	5702.25	621.12	1757.05
	840.606	1746.49	520.734
	2177.33	2301.71	624.819
	1535.97	1182.01	1008.33
	146.546	821.99	462.611
	358.912	1071.05	510.702
	166.729	595.929	607.82
	178.162	1812.81	907.502
	222.161	2101.23	492.712
	362.932	631.207	921.212
	168.197	1307.74	563.649
	170.386	1544.16	2133.5
	165.871	1263.89	1630.19
	226.361	2062.61	1465.01
	435.651	977.723	1304.58
	1051.74	2241.61	1939.74
	800.323	3346.47	1099.59
	401.808	628.477	949.584
	1325.57	2227.3	1779.67
	2550.01	2435.92	1204.55
	2968.51	2234.48	896.877
	2677.31	842.566	581.434
	554.925	642.634	343.514
	1941.04	445.544	687.898
	332.802	541.338	687.803
	1081.83	691.914	440.471
	676.825	435.622	461.724
	469.862	603.714	347.068
	431.692	3421.67	751.857
	581.623	625.678	703.365
	549.474	1409.89	896.719
	588.068	3132.97	364.469
	548.358	2851.08	474.203
	535.702	4515.1	473.049
	500.053	4244.14	463.125
	667.348	1642.21	569.242
	542.068	2319.47	604.472
	1095.12	657.94	512.383
	554.464	366.54	449.146
	2429.82	520.421	663.518
	488.732	3968.99	590.356
	277.448	3867.8	724.334
	431.574	2729.8	594.093
	3733.63	806.221	554.746
	4718.47	2934.88	577.758
	2761.74	1435.12	797.107
	2727.21	1251.3	1690.57
	874.823	1427.57	874.334
	2896.31	2174.86	668.853
	2647.36	484.869	765.652
	857.034	397.95	783.774
	2555.79	155.36	557.991
	1469.74	431.435	669.093
		369.16	810.141
		723.44	717.108
		598.49	645.415
		982.134	520.033
		503.606	450.677
		2273.73	585.166
		2459.55	562.942
		1865.6	564.231
		446.479	607.337
		4814.41	1174.91
		1000.57	1132.86
		377.262	1710.69
		717.467	1353.26
		1090.58	975.808
		670.727	702.275
		432.291	1749.18
		682.47	482.634
		624.135	688.35
		1369.66	1153.75
		2501.15	1342.57
		1287.29	740.919
		4198.24	453.228
		3446.66	606.971
		1810.22	873.225
		527.545	660.279
		1916.47	1012.27
		594.443	1450.42
		552.821	1366.74
		478.699	2091.89
		342.851	874.388
		583.033	280.749
		2923.91	287.077
		1456.15	358.488
		3827.44	291.887
		3230.9	460.755
		1860.36	331.717
		5400.91	329.565
		788.039	343.977
		2367.54	304.86
		419.693	649.377
		731.653	494.203
		1736.2	491.096
		1916.18	333.278
		6852.05	334.075
		3217.12	478.351
		311.969	322.876
		1342.32	260.612
		336.328	855.757
		1315.89	1237.86
		2675.58	492.778
		2204.36	1686.06
		2090.87	616.876
		4281.13	942.284
		2173.61	2041.15
		4589.92	1083.59
		5671.17	897.621
		4598.24	2135.11
		1939.8	280.749
		3230.8	280.749
		1270.59	280.749
		3037.87	280.749
		1789.56	398.086
		4225.88	456.099
		2095.69	988.933
		1643.27	659.3
		2453.99	309.838
		506.354	725.507
		3128.82	783.128
		960.438	978.444
			378.8
			358.349
			289.372
			253.349
			230.1
			227.11
			485.392
			1193.44
			284.915
			410.814
			519.384
			238.307
			1307
			374.784
			2492.59
			321.813
			1427.26
			572.021
			667.278
			567.523
			363.455
			429.029
			443.777
			430.101
			263.373
			1210.8
			1054.56
			2010.69
			1172.58
			1423.19
			1237.82
			1258.52
			1631.87
			977.798
			1107.05
			948.057
			1578.7
			941.823
			1455.38
			901.448
			850.147
			909.958
			1011.16
			1675.73
			1219.73
			880.838
			1055.69
			1229.68
			1293.26
			1799.66
			1023.44
			1126.15
			2026.38
			513.936
			579.013
			347.092
			487.682
			351.301
			531.731
			434.171
			328.398
			296.068
			402.48
			363.727
			498.353
			350.642
			439.7
			476.968
			553.621
			508.68
			416.27
			358.533
			391.343
			311.45
			428.8
			370.355
			397.782
			389.098
			2302.36
			354.525
			496.748
			528.745
			338.797
			1818.98
			460.857
			538.153
			383.929
			270.311
			374.904
			592.029
			3119.8
			368.662
			992.55
			717.928
			380.664
			341.408
			332.158
			269.501
			325.379
			511.731
			370.55

## Sheet: Figure2-suppl1C
Normalized integrated calcium variation over time
dorsal CSF-contacting neurons
icm15	+/+	+/-	-/-
median	408.184	407.878	394.614
	147.844	239.213	206.2
	172.387	250.072	220.137
	175.227	250.496	221.051
	175.312	252.705	235.411
	184.302	257.352	244.026
	205.83	260.898	244.362
	209.376	262.463	245.383
	230.299	264.161	247.901
	236.961	265.514	250.496
	259.315	266.539	255.849
	267.394	270.519	260.417
	269.116	278.232	263.908
	275.466	279.33	266.084
	278.109	279.511	266.114
	287.814	280.296	266.594
	291.134	283.255	270.892
	296.848	285.804	273.323
	297.691	292.603	273.591
	302.094	297.439	274.476
	311.248	297.642	274.69
	314.135	299.076	275.184
	325.691	300.138	275.923
	331.535	300.888	275.925
	335.974	300.92	281.45
	336.739	301.473	282.619
	338.964	303.267	283.255
	343.614	303.334	284.929
	345.773	304.512	289.553
	347.171	309	290.011
	347.508	309.147	290.648
	353.608	309.729	295.276
	353.876	310.321	295.731
	354.057	310.495	295.862
	368.962	311.49	296.48
	374.058	312.441	298.19
	374.558	312.539	298.234
	377.133	313.288	299.185
	379.914	314.323	299.457
	388.159	315.679	299.66
	391.611	315.825	299.756
	395.61	317.265	300.798
	396.073	318.293	303.433
	396.607	318.503	305.395
	399.391	321.843	306.454
	399.805	324.995	309.628
	399.829	325.441	310.787
	406.199	326.584	311.677
	408.184	328.769	312.869
	412.921	329.071	313.288
	424.362	329.085	315.114
	435.726	329.733	315.349
	444.873	330.445	316.17
	449.044	331.122	316.493
	462.271	331.231	318.175
	465.088	331.711	319.165
	466.653	332.622	319.277
	478.607	333.583	319.659
	481.461	333.747	319.741
	485.137	334.617	320.707
	504.856	335.08	321.376
	510.109	338.14	322.987
	514.056	338.143	324.968
	514.528	339.575	324.995
	530.211	339.919	325.099
	540.481	341.1	326.079
	547.649	343.505	326.254
	570.55	343.586	327.025
	579.407	344.678	327.776
	581.96	345.345	329.447
	585.325	346.667	329.828
	618.78	347.013	329.978
	633.584	347.803	330.039
	662.093	348.602	330.346
	674.017	348.685	330.838
	677.915	348.793	331.832
	708.292	349.286	332.484
	709.252	353.328	333.747
	737.052	353.596	335.101
	760.169	354.019	335.611
	764.846	354.171	336.825
	767.813	354.575	338.14
	804.461	356.13	338.404
	815.86	356.654	338.861
	833.063	357.944	342.446
	852.547	358.063	343.646
	858.101	358.733	345.938
	974.159	361.517	346.934
	1047.21	362.107	346.986
	1080.82	362.431	348.152
	1265.1	363.52	348.176
	1290.13	365.315	349.124
	1536.66	365.434	349.366
	1612.14	365.682	349.92
	1668.08	366.287	351.212
	2481.9	367.228	352.239
		367.419	355.39
		370.085	356.162
		372.697	356.441
		373.673	356.464
		373.911	358.462
		377.758	358.737
		377.832	360.73
		379.529	361.076
		380.261	361.686
		381.81	365.845
		382.229	366.283
		383.278	367.462
		384.459	370.038
		387.483	370.281
		387.589	370.32
		389.096	370.416
		389.171	371.175
		391.272	374.162
		392.213	375.123
		394.295	376.529
		394.327	380.597
		399.768	382.205
		401.19	382.221
		407.466	382.952
		407.47	384.167
		407.53	384.698
		407.878	384.852
		409.206	386.085
		409.801	389.648
		413.599	390.408
		414.036	390.875
		416.106	393.193
		417.551	394.614
		417.944	395.923
		419.787	396.742
		422.648	396.752
		422.822	401.825
		425.09	401.833
		427.064	403.192
		428.838	403.493
		430.87	404.421
		432.125	409.41
		432.512	411.079
		433.1	411.403
		433.456	411.538
		435.554	412.054
		439.271	412.58
		441.4	412.837
		442.563	413.733
		443.427	417.507
		443.99	417.758
		445.836	417.864
		446.42	419.731
		446.439	424.443
		453.861	428.278
		455.421	429.99
		455.478	430.806
		455.691	432.127
		457.269	432.822
		458.783	433.663
		459.01	434.081
		462.086	434.512
		463.96	434.922
		464.094	435.674
		471.298	438.376
		471.792	439.697
		473.383	440.191
		475.893	444.041
		476.379	445.895
		478.804	446.075
		479.937	447.872
		480.865	448.486
		481.064	450.621
		481.835	452.261
		482.005	453.267
		482.285	453.941
		483.556	454.797
		487.006	455.478
		487.184	457.328
		488.351	459.635
		496.989	462.429
		497.243	466.089
		498.08	468.599
		498.314	471.173
		503.553	471.617
		504.012	472.832
		504.881	474.564
		505.571	475.806
		505.576	476.784
		505.879	480.749
		505.89	481.374
		507.077	481.835
		508.487	483.105
		509.31	484.799
		510.871	485.401
		514.616	486.624
		516.696	489.089
		518.556	492.72
		520.96	496.051
		528.005	498.798
		528.384	499.465
		530.369	501.252
		530.377	510.654
		530.566	515.437
		542.085	515.907
		543.041	517.686
		543.633	518.019
		545.444	518.556
		549.075	528.005
		554.487	529.567
		556.971	529.639
		564.601	530.58
		566.066	532.149
		567.005	534.92
		568.448	545.021
		572.32	546.47
		578.999	555.108
		583.551	556.973
		594.423	557.59
		607.245	557.723
		613.041	572.461
		614.725	578.936
		624.504	581.662
		625.316	601.305
		645.052	603.05
		648.462	603.62
		664.528	604.024
		699.313	611.556
		706.201	612.888
		713.95	622.3
		739.526	623.812
		762.339	626.434
		777.519	629.374
		889.131	647.831
		910.384	650.759
		931.776	651.577
		1021.31	667.013
		1124.37	671.942
		1288.15	674.175
		1293.58	703.623
		1367.66	732.274
		1437.68	732.962
		1546.1	738.486
		1624.12	742.618
		1663.67	774.321
		1734.63	777.519
		2159.25	793.665
		2803.13	802.105
			854.65
			868.128
			956.75
			980.2
			1146.74
			1147.39
			1188.1
			1219.7
			1266.66
			1333.84
			1448.26
			1699.13
