# Supplementary material for: Adrenergic activation modulates the signal from the Reissner fiber to cerebrospinal fluid-contacting neurons during development
Source: eLife. 2020 Oct 13;9:e59469. doi: 10.7554/eLife.59469 (PMC7591253; doi:10.7554/eLife.59469)
Supplement: Figure 3—source data 1. [file elife-59469-fig3-data1.xlsx]

## Sheet: qPCR
30 hpf	WT1	WT2	WT3	WT4	WT5	WT6		Mut1	Mut2	Mut3	Mut4
urp1	0.00945308	0.00878952	0.0140495	0.0102138	0.0195052	0.0263997		0.0193034	0.0215675	0.0125457	0.0220971
urp2	0.0174576	0.0154634	0.0232493	0.00157184	0.00667662	0.0255594		0.0177628	0.0193704	0.00369554	0.0231154
pkd2l1	0.0388754	0.0402463	0.0450187	0.00523837	0.0235739	0.0332616		0.00837323	0.00894316	0.00112178	0.00692006
	moy WT		p values					moy Mut
urp1	0.0147351		0.325836					0.0188784
urp2	0.0149964		0.869349					0.015986
pkd2l1	0.0310357		0.0116443					0.00633956
30 hpf	WT1	WT2	WT3	WT4	WT5	WT6		Mut1	Mut2	Mut3	Mut4
urp1	0.641533	0.596501	0.953472	0.693161	1.32372	1.79162		1.31003	1.46368	0.851412	1.49962
urp2	1.16412	1.03114	1.55033	0.104814	0.445216	1.70437		1.18447	1.29167	0.246429	1.5414
pkd2l1	1.2526	1.29677	1.45054	0.168785	0.759573	1.07172		0.269794	0.288157	0.0361447	0.222971
	moy WT		p values					moy MUT
urp1	1		0.325836					1.28118
urp2	1		0.869349					1.06599
pkd2l1	1		0.0116443					0.204267
