# Supplementary material for: Adrenergic activation modulates the signal from the Reissner fiber to cerebrospinal fluid-contacting neurons during development
Source: eLife. 2020 Oct 13;9:e59469. doi: 10.7554/eLife.59469 (PMC7591253; doi:10.7554/eLife.59469)
Supplement: Figure 4—source data 1. [file elife-59469-fig4-data1.xlsx]

## Sheet: Figure4C
Tail angle after different treatments
	vehicle treatment				epinephrine treatment					norepinephrine treatment
	curled		straight			curled		straight			curled		straight
expt#1	122.394	expt#1	186.454		expt#1	159.583	expt#1	220.561		expt#1	170.989	expt#1	243.627
expt#1	103.777	expt#1	202.616		expt#1	175.96	expt#1	225.404		expt#1	153.539	expt#1	216.056
expt#1	123.623	expt#1	200.359		expt#1	156.746	expt#1	204.126		expt#1	141.535	expt#1	221.238
expt#1	103.559	expt#1	191.015		expt#1	162.539	expt#1	208.705		expt#1	216.977	expt#1	234.615
expt#1	106.142	expt#1	196.888		expt#1	171.863	expt#1	221.33		expt#1	141.595	expt#1	221.032
expt#1	106.817	expt#1	191.33		expt#1	155.771	expt#1	229.943		expt#1	164.12	expt#1	198.045
expt#1	111.259	expt#1	188.909		expt#1	178.295	expt#1	220.16		expt#1	172.071	expt#1	229.747
expt#2	77.186	expt#2	196.3		expt#1	142.605	expt#1	226.435		expt#1	153.346	expt#1	225.135
expt#2	113.576	expt#2	182.046		expt#1	188.208	expt#2	173.631		expt#1	160.916	expt#1	234.123
expt#2	96.761	expt#2	201.286		expt#1	154.639	expt#2	221.627		expt#2	156.022	expt#2	172.322
expt#2	128.551	expt#2	190.301		expt#2	150.19	expt#2	224.515		expt#2	164.787	expt#2	213.056
expt#2	130.123	expt#2	186.011		expt#2	178.593	expt#2	228.399		expt#2	155.578	expt#2	209.724
expt#2	75.383	expt#2	180.158		expt#2	166.692	expt#2	228.154		expt#2	141.98	expt#2	199.847
expt#2	131.189	expt#2	181.958		expt#2	222.896	expt#2	188.116		expt#2	143.51	expt#2	222.304
expt#3	90.774	expt#2	187.087		expt#2	141.493	expt#2	227.829		expt#2	154.658	expt#2	207.01
expt#3	82.831	expt#2	192.939		expt#2	166.104	expt#3	202.842		expt#2	178.785	expt#2	219.387
expt#3	75.377	expt#3	182.744		expt#2	173.361	expt#3	171.035		expt#3	169.28	expt#2	225.965
expt#3	115.992	expt#3	188.525		expt#2	224.852	expt#3	215.071		expt#3	170.52	expt#3	200.028
expt#3	116.245	expt#3	196.937		expt#3	193.493	expt#3	188.853		expt#3	171.552	expt#3	210.276
expt#3	95.657	expt#3	193.997		expt#3	167.543	expt#3	205.647		expt#3	171.705	expt#3	173.251
		expt#3	187.099		expt#3	166.61				expt#3	135.806	expt#3	179.391
		expt#3	187.173		expt#3	159.329				expt#3	155.889	expt#3	205.65
		expt#3	191.089		expt#3	197.601						expt#3	213.574
		expt#3	193.568		expt#3	202.312						expt#3	208.865
												expt#3	222.556

## Sheet: Figure4D-E
After normalisation with straight average
urp1	control + H20	control + epi	control + norepi	mutant + H20	mutant + epi	mutant + norepi
Yasm_A1e	0.906414	n.d.	1.23391	1.46738	1.11593	1.35966
Yasm_B1e	1.02686	n.d.	n.d.	n.d.	1.26421	1.42232
Yasm_A2e	0.703802	0.797326	1.49821	0.614822	1.76938	1.10822
Yasm_B2e	1.47759	1.64518	1.10056	0.640931	1.66237	1.28631
Yasm_A3e	1.19602	0.897038	0.728621	0.556033	1.62253	0.919067
Yasm_B3e	0.689318	1.1198	0.96476	0.640931	1.15128	0.906414
average	1	1.11483	1.10521	0.784019	1.43095	1.167
urp2	control + H20	control + epi	control + norepi	mutant + H20	mutant + epi	mutant + norepi
Yasm_A1e	1.20774	n.d.	1.82425	0.392919	0.398404	0.480399
Yasm_B1e	1.13077	1.84332	n.d.	0.282692	0.538607	1.09604
Yasm_A2e	0.200588	0.183303	2.19209	0.0403106	1.21193	0.205513
Yasm_B2e	1.6962	2.06666	1.98936	0.107865	0.80235	0.980986
Yasm_A3e	1.34939	0.349243	0.325856	0.0768029	0.197826	0.548022
Yasm_B3e	0.415323	1.74994	1.59915	0.187805	0.282692	0.298811
average	1	1.23849	1.58614	0.181399	0.571968	0.601629
qPCR 30hpf icm15 (after lsm12b normalisation)
urp1	control + H20	control + epi	control + norepi	mutant + H20	mutant + epi	mutant + norepi
Yasm_A1e	0.032352	n.d.	0.0440413	0.0523742	0.03983	0.0485293
Yasm_B1e	0.0366511	n.d.	n.d.	n.d.	0.0451228	0.0507658
Yasm_A2e	0.0251203	0.0284584	0.0534747	0.0219445	0.0631532	0.0395549
Yasm_B2e	0.0527385	0.0587202	0.0392817	0.0228763	0.0593339	0.0459115
Yasm_A3e	0.0426888	0.0320174	0.0260062	0.0198461	0.0579118	0.0328036
Yasm_B3e	0.0246034	0.0399683	0.0344345	0.0228763	0.041092	0.032352
average	0.0356923	0.0397911	0.0394477	0.0279835	0.0510739	0.0416529
urp2	control + H20	control + epi	control + norepi	mutant + H20	mutant + epi	mutant + norepi
Yasm_A1e	0.0187106	n.d.	0.0282619	0.00608722	0.0061722	0.00744248
Yasm_B1e	0.0175182	0.0285572	n.d.	0.00437955	0.00834426	0.0169802
Yasm_A2e	0.00310756	0.00283979	0.0339605	0.000624505	0.0187756	0.00318388
Yasm_B2e	0.026278	0.0320174	0.0308198	0.00167108	0.0124303	0.0151977
Yasm_A3e	0.0209051	0.00541058	0.00504825	0.00118985	0.00306478	0.00849012
Yasm_B3e	0.0064343	0.0271106	0.0247745	0.00290953	0.00437955	0.00462927
average	0.0154923	0.0191871	0.024573	0.00281029	0.0088611	0.00932062
