# Supplementary material for: Adrenergic activation modulates the signal from the Reissner fiber to cerebrospinal fluid-contacting neurons during development
Source: eLife. 2020 Oct 13;9:e59469. doi: 10.7554/eLife.59469 (PMC7591253; doi:10.7554/eLife.59469)
Supplement: Figure 5—source data 1. [file elife-59469-fig5-data1.xlsx]

## Sheet: Feuil1
Normalized integrated calcium variation over time
ventral CSF-contacting neurons
icm15	curled				straight
	vehicle treatment	epinephrine treatment	norepinephrine treatment		vehicle treatment	epinephrine treatment	norepinephrine treatment
median	515.674	876.798	972.607		922.449	1201.21	684.371
	230.607	243.933	326.398		246.314	252.151	154.64
	250.542	270.217	328.739		278.183	269.345	251.649
	256.471	280.739	338.512		339.117	288.19	266.818
	257.98	297.461	342.566		346.177	303.959	268.647
	258.094	312.705	344.202		348.309	308.153	288.889
	283.11	335.959	348.88		355.33	322.139	298.22
	290.774	337.289	352.235		357.558	323.944	303.5
	300.818	344.558	373.887		361.862	331.978	311.074
	307.282	353.692	383.51		362.002	340.075	321.413
	308.765	355.93	389.491		370.218	348.856	321.854
	310.225	361.81	390.171		375.589	363.993	328.621
	311.633	366.591	402.553		387.916	364.075	334.774
	326.39	374.88	405.417		388.879	373.751	344.875
	335.905	376.442	414.467		397.899	376.519	361.82
	335.936	392.642	415.171		398.476	378.672	364.052
	338.951	398.219	416.919		404.402	382.338	366.875
	340.333	400.411	419.66		413.247	387.865	372.325
	348.644	401.623	421.395		424.144	387.994	374.32
	357.069	404.327	421.942		428.323	392.132	375.483
	357.11	416.76	423.625		431.123	398.671	379.765
	359.118	420.139	430.139		437.327	404.56	385.773
	362.092	432.752	437.704		439.079	409.564	387.221
	366.563	438.755	443.621		443.569	413.192	387.41
	368.801	441.17	445.056		445.883	416.502	390.007
	370.213	444.954	452.155		446.765	424.703	394.39
	371.773	447.111	482.665		450.972	450.832	395.566
	376.273	455.488	485.255		454.647	463.127	399.034
	377.143	462.824	492.488		455.756	474.087	400.152
	379.188	469.477	496.436		461.248	481.936	401.908
	379.966	477.307	501.963		467.108	489.383	403.052
	381.029	486.765	504.746		469.441	489.97	407.761
	382.903	488.751	504.995		474.926	501.482	415.492
	383.688	513.045	510.664		477.998	504.299	424.513
	384.051	520.299	543.207		478.675	509.488	429.527
	384.471	522.469	545.067		479.663	512.672	444.9
	384.798	535.67	546.303		485.617	513.8	446.205
	386.717	545.837	550.544		494.326	517.104	447.786
	388.881	562.678	585.066		504.909	517.416	460.253
	389.91	568.015	587.208		512.659	522.917	471.067
	393.435	587.322	596.371		513.379	524.049	476.636
	394.689	611.11	604.949		513.788	536.023	478.673
	394.938	613.522	608.609		522.692	544.986	479.726
	395.895	618.22	621.17		531.996	554.179	482.239
	396.21	618.587	628.053		537.738	558.999	483.831
	403.399	634.337	629.108		540.489	565.134	487.12
	404.288	640.153	636.475		556.423	567.933	492.965
	408.202	678.965	638.208		563.225	580.458	495.072
	408.967	688.333	659.719		579.65	592.424	497.844
	411.868	697.432	661.966		588.293	598.633	500.695
	411.869	745.705	671.982		593.228	600.015	505.491
	414.57	765.346	675.043		630.921	618.582	512.85
	416.37	767.985	675.467		643.929	623.053	513.122
	419.428	768.347	678.95		665.529	648.707	519.694
	422.534	779.75	684.505		683.031	654.78	520.784
	424.71	792.504	692.176		692.226	705.632	521.515
	428.673	809.408	704.012		699.524	710.128	535.488
	429.438	825.92	719.815		736.802	739.089	535.909
	442.277	854.391	725.737		743.832	743.932	546.515
	443.975	859.758	774.132		761.059	885.237	549.77
	445.218	866.119	794.565		784.847	902.59	552.96
	445.285	871.769	806.261		793.497	917.567	557.666
	451.529	876.692	828.768		801.187	987.725	558.051
	454.345	876.904	847.581		887.119	988.69	561.588
	466.266	898.592	853.921		893.566	1005.78	563.28
	467.404	1007.87	860.708		902.732	1015.87	566.142
	471.47	1028.35	887.432		922.449	1016.98	570.009
	472.77	1031.76	891.09		960.738	1028.95	578.486
	473.627	1052.73	906.61		961.636	1039	584.628
	474.27	1101.02	916.161		998.278	1073.91	587.24
	478.178	1144.18	928.198		1038.18	1074.23	602.34
	482.429	1158.47	932.175		1039.24	1087.74	614.288
	485.441	1164.38	952.951		1053.63	1112.66	615.213
	493.323	1166.84	955.301		1072.7	1115.38	617.161
	495.824	1189.03	964.194		1123.06	1117.46	624.518
	497.75	1232.49	972.126		1140.26	1189.61	630.671
	502.169	1273.48	973.089		1141.86	1212.82	640.287
	502.499	1317.79	979.014		1159.33	1226.3	649.431
	507.183	1349.83	979.593		1165.2	1226.64	666.192
	510.824	1357.83	993.288		1253.9	1255.9	668.177
	511.482	1364.99	995.52		1264.25	1317.05	670.657
	512.22	1377.78	996.264		1285.37	1329.29	671.823
	513.25	1411.79	1011.94		1293.5	1353.59	681.018
	513.369	1415.61	1023.26		1337.62	1370.48	687.724
	515.399	1419.35	1024.51		1338.04	1380.09	689.386
	515.95	1423.32	1044.07		1349.25	1394.57	695.413
	516.351	1446.49	1048.06		1394.48	1442.44	697.595
	516.791	1489.12	1050.92		1412.46	1506.02	704.364
	523.832	1549.14	1091.72		1459.69	1538.06	712.871
	525.142	1575.38	1094.88		1461.3	1555.21	714.18
	527.843	1594	1097.62		1481.28	1695.88	718.937
	530.757	1622.15	1101.02		1481.53	1743.99	721.987
	531.429	1640.56	1107.35		1537.49	1744.75	724.285
	532.169	1689.39	1127.63		1667.79	1749.06	755.086
	534.699	1713.82	1130.44		1737.33	1838.13	756.97
	550.686	1748.88	1135.11		1745.02	1856.47	785.53
	551.727	1775.75	1153.5		1792.44	1864.45	860.069
	565.42	1891.8	1173.73		1792.47	1917.04	861.257
	565.988	1921.68	1194.12		1814.35	1922.41	862.435
	567.311	2055.53	1195.86		1818.75	1926.48	870.928
	569.247	2175.36	1201.64		1853.22	1935.26	887.553
	570.01	2374.12	1205.44		1931.22	1978.43	904.583
	575.691	2408.07	1214.61		1985.51	2113.69	918.615
	578.007	2517.52	1223.4		2202.29	2114.13	923.082
	598.93	2701.47	1233.1		2214.05	2216.15	928.328
	599.702	2706.65	1254.77		2254.17	2252.07	936.934
	604.29	2846.09	1277.64		2262.19	2265.34	942.338
	606.511	2853.04	1291.68		2341	2290.71	967.4
	608.18	3202.89	1293.43		2657.13	2323.89	973.14
	608.263	3375	1303.47		2710.04	2333.71	984.437
	609.766	3480.14	1346.53		2801.19	2380.18	986.879
	612.698	3617.11	1359.58		2932.52	2460.53	1012.22
	617.723	3789.53	1363.35		3337.49	2506.45	1071.72
	620.187	3800.18	1363.47		3444.27	2535.58	1112.07
	630.219	3818.78	1370.47		3555.25	2696.01	1136.3
	636.502	3969.52	1390.34		3636.89	2699.52	1142.22
	638.701	4236.04	1391.36		3643.44	2963.62	1157.02
	650.869	4668.75	1412.84		3919.62	3164.49	1190.72
	659.921	4847.57	1418.41		3953.73	3185.9	1195.15
	670.669	4896.22	1455.3		4019.44	3261.31	1209.61
	676.404	5163.92	1543.45		4184.86	3265.89	1220.86
	679.609	5293.55	1547.47		4298.56	3305.02	1287.05
	697.733	6144.6	1588.45		4302.73	3306.45	1325.97
	724.624	6343.78	1588.99		4423.78	3365.41	1351.39
	725.838	6835.96	1607.61		4506.22	3402.54	1353.9
	734.862		1652.4		4531.64	3504.51	1375.56
	741.798		1679.44		4818.31	3542.2	1408.15
	741.875		1714.61		5187.45	3569.38	1410.2
	759.639		1718.11		5228.51	3764.42	1416.55
	761.86		1730.84		5230.34	3817.73	1475.82
	794.489		1770.31		5377.59	3956.15	1643.86
	794.593		1770.49		5868.42	3967.64	1744
	811.956		1777.68			4003.46	1763.21
	829.387		1881.94			4040.77	1820.62
	849.107		1893.79			4271.35	1833
	856.91		1936.69			4282.39	1868.06
	857.855		2034.17			4288.62	1879.5
	879.533		2069.99			4505.08	1941.73
	917.462		2163.23			4540.1	1957.75
	1003.29		2265.46			4548.12	1975.53
	1017.84		2320.87			4803.06	2033.28
	1024.16		2453.73			4837.91	2111.81
	1026.33		2472.87			5073.37	2115.01
	1029.82		2636.03			5081.37	2185.39
	1040.98		3543.9			5113.01	2238.17
	1061.33		4071.46			5141.17	2332.04
	1072.94		6099.87			5655.31	2568.64
	1111.43		6629.89			5970.7	2622.79
	1147.08		7462.7			6156.95	2701.29
	1147.98		7885.36			6326.91	2777.85
	1148.67		8194.42			6404.49	2798.9
	1155.29						2901.56
	1163.38						2949.14
	1183.85						3005.16
	1184.91						3305.68
	1189.8						3541.28
	1221.33						3642.47
	1314.24						3914.33
	1356.96						3960.53
	1367.28						4056.96
	1429.31						4135.38
	1584.2						4467.09
	1599.9						5333.21
	1637.48						5567.74
	1687.15						6621.58
	1711.81
	2003.46
	2046.23
	2289.17
