# Supplementary material for: Adrenergic activation modulates the signal from the Reissner fiber to cerebrospinal fluid-contacting neurons during development
Source: eLife journal article supplement (doi:10.7554/elife.59469), 2020-10-13
Supplement: supp [file elife_poa_e59469_Figure_3_figure_supplement_1.pdf › elife_poa_e59469_Figure_3_figure_supplement_1.pdf]

**A***control mRNA* injection

+/+      +/-      -/-

|             |   |   |    |
|-------------|---|---|----|
| straight    | 3 | 8 | 0  |
| curled up   | 0 | 0 | 0  |
| curled down | 0 | 0 | 12 |

**B***control mRNA +urp2* injection

+/+      +/-      -/-

|             |    |    |          |
|-------------|----|----|----------|
| straight    | 20 | 43 | <b>2</b> |
| curled up   | 1  | 3  | <b>2</b> |
| curled down | 0  | 0  | 9        |
