# Supplementary figures and images for: Adrenergic activation modulates the signal from the Reissner fiber to cerebrospinal fluid-contacting neurons during development
Source: eLife journal article supplement (doi:10.7554/elife.59469), 2020-10-13

**control sibling**

***scospondin*<sup>icm15/icm15</sup>**

20 hpf

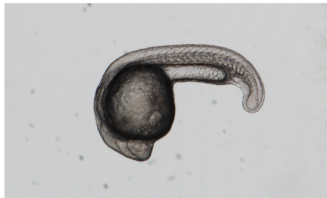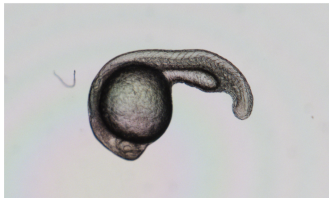

22 hpf

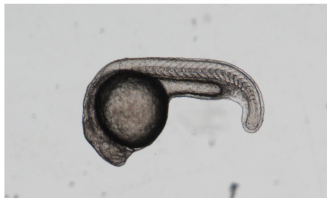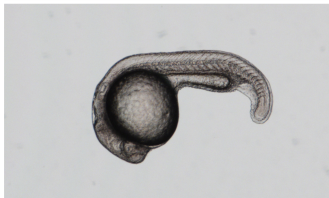

24 hpf

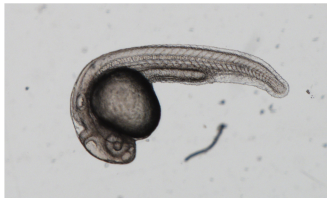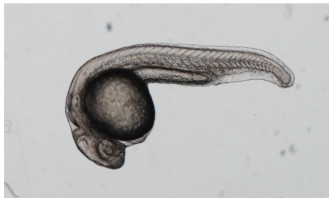

28 hpf

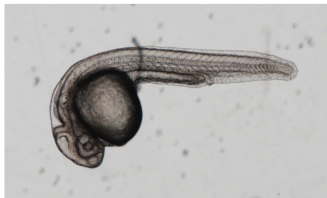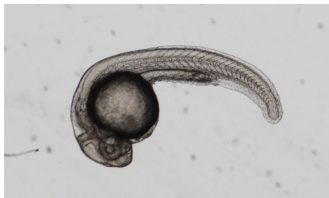

30 hpf

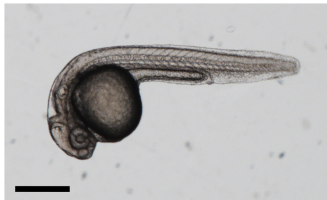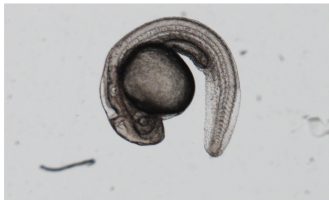

Supplement: supp [file elife_poa_e59469_Figure_1_figure_supplement_1.pdf › elife_poa_e59469_Figure_1_figure_supplement_1.pdf]

**A** ventral CSF-cNs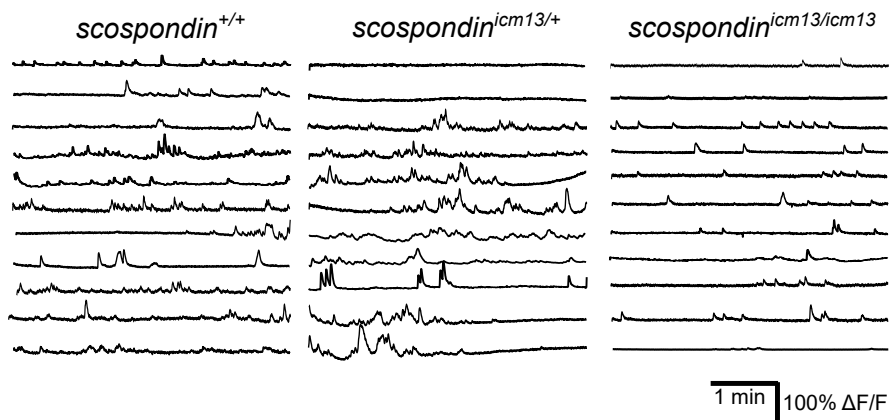**B**

## ventral CSF-cNs

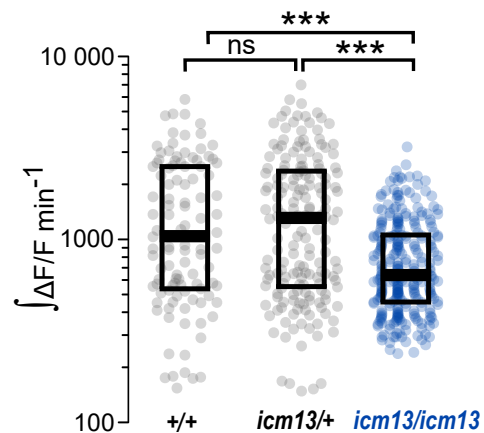**C**

## dorsolateral CSF-cNs

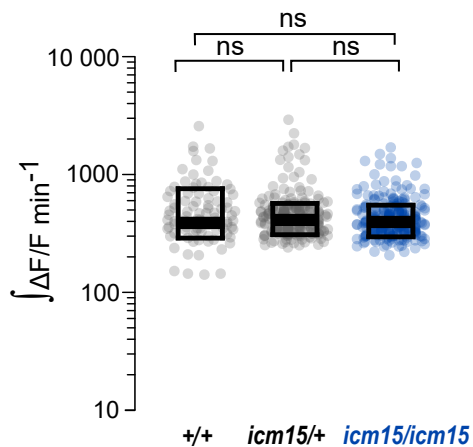**D**

## dorsolateral CSF-cNs

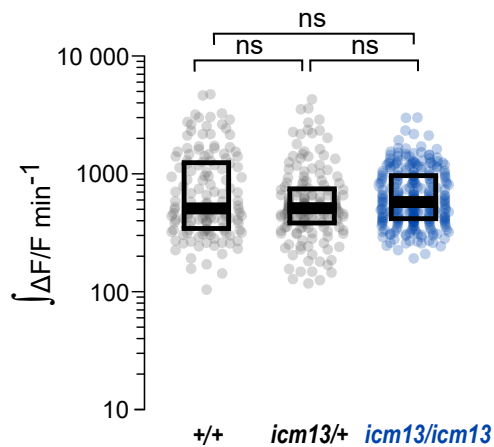

Supplement: supp [file elife_poa_e59469_Figure_2_figure_supplement_1.pdf › elife_poa_e59469_Figure_2_figure_supplement_1.pdf]

**A**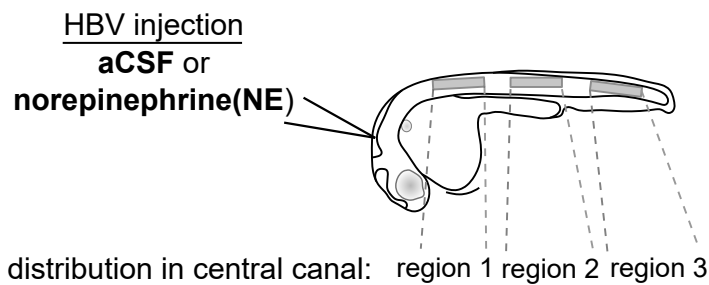**B**

**anti-norepinephrine**

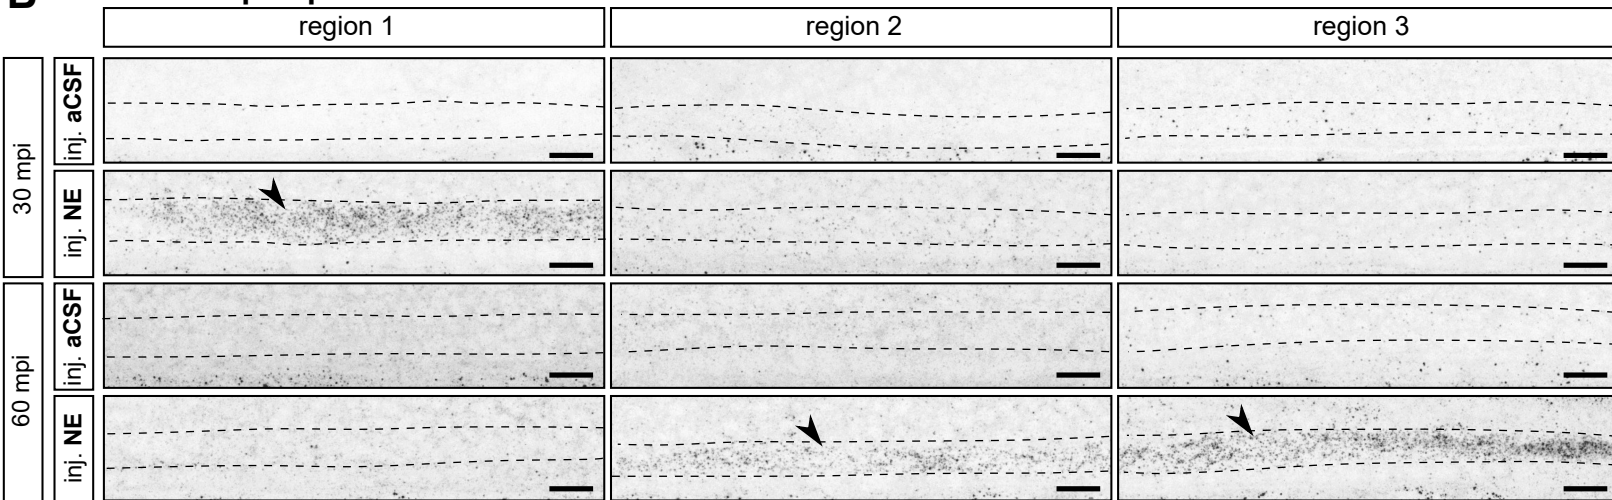

Supplement: supp [file elife_poa_e59469_Figure_5_figure_supplement_1.pdf › elife_poa_e59469_Figure_5_figure_supplement_1.pdf]
